# Supplementary material for: Global epidemiological profile in nasopharyngeal carcinoma: a prediction study
Source: HighWire-hosted journal article supplement (doi:10.1136/bmjopen-2024-091087), 2024-12-01

## Supplementary Tables

**Figure S1: Heatmap of the Global Burden of Disease for ASDR by NPC in 2020 by Country and sex (A) both sex (B) male (C) female. ASDR = age standardized death rate.**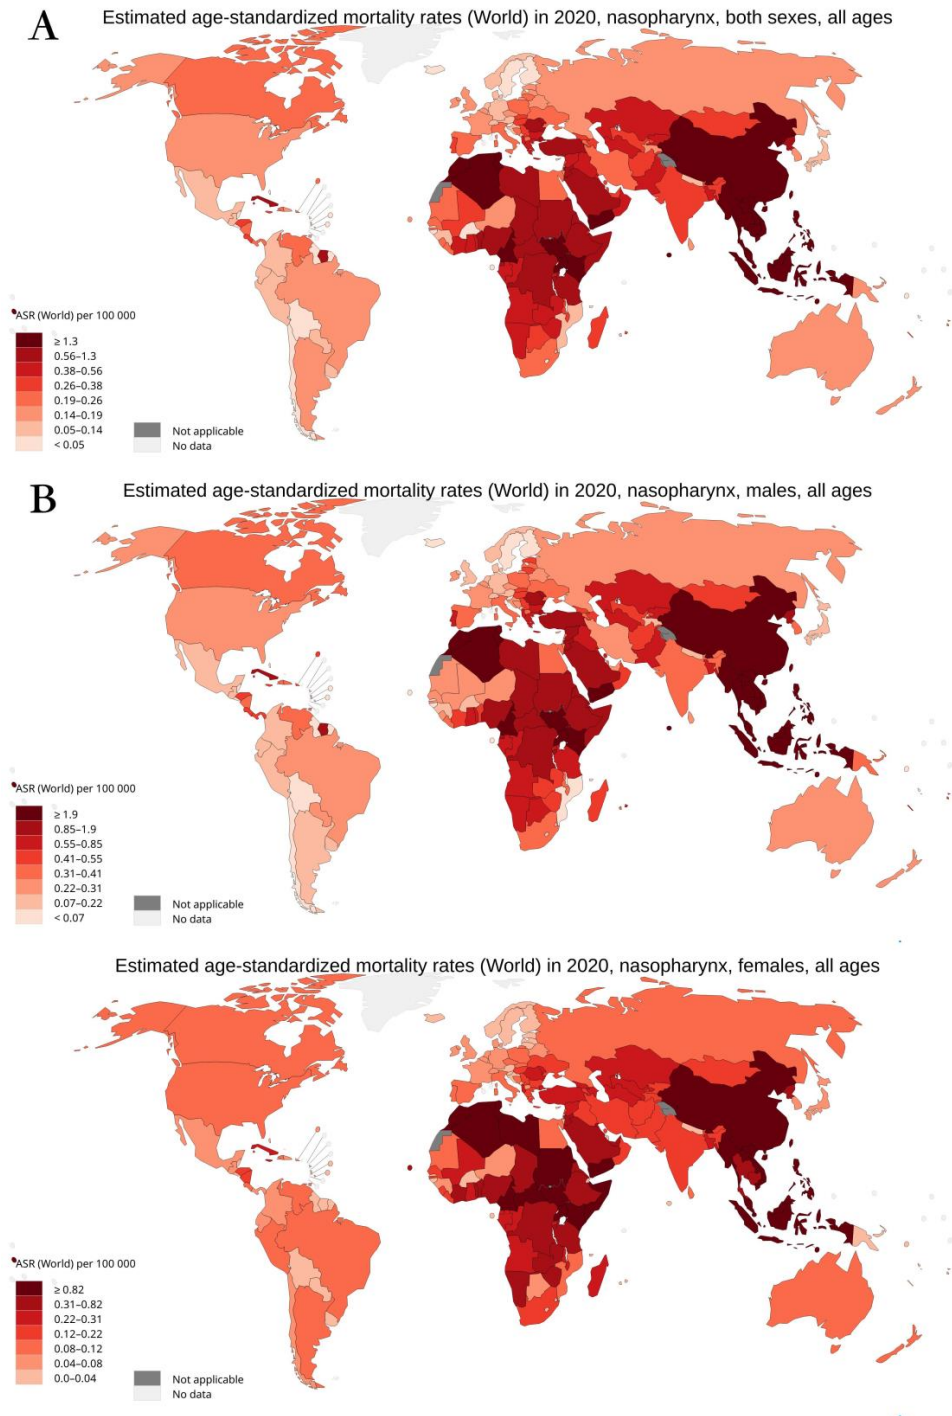

**Figure S2: Scatterplot of ASIR and ASDR versus HDI for NPC 2020 for each country, by continent (A) ASIR (B) ASDR.** ASIR = age standardized incidence rate. ASDR = age standardized death rate.

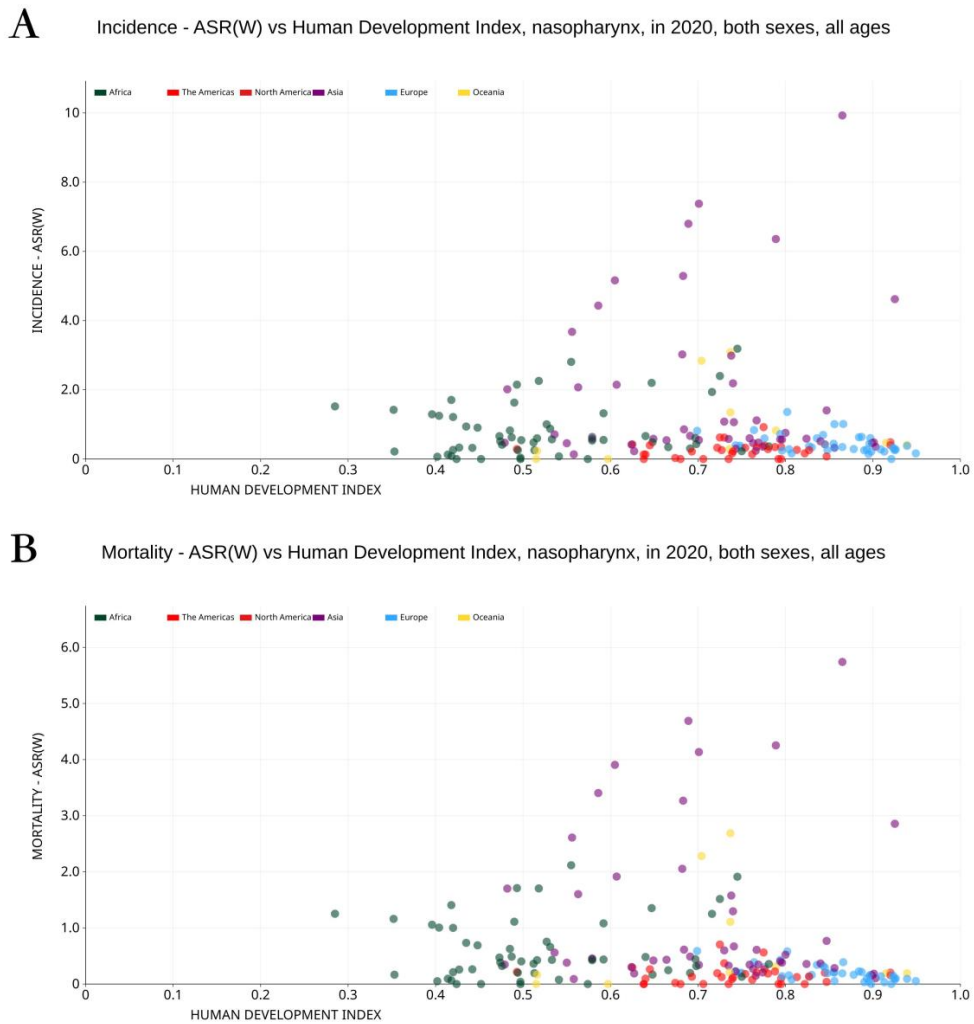

**Figure S3: Projected disease burden of ASIR and ASDR in NPC by region globally in 2020 vs. 2040. (A) ASIR (B) ASDR** ASIR = age standardized incidence rate. ASDR = age standardized death rate.

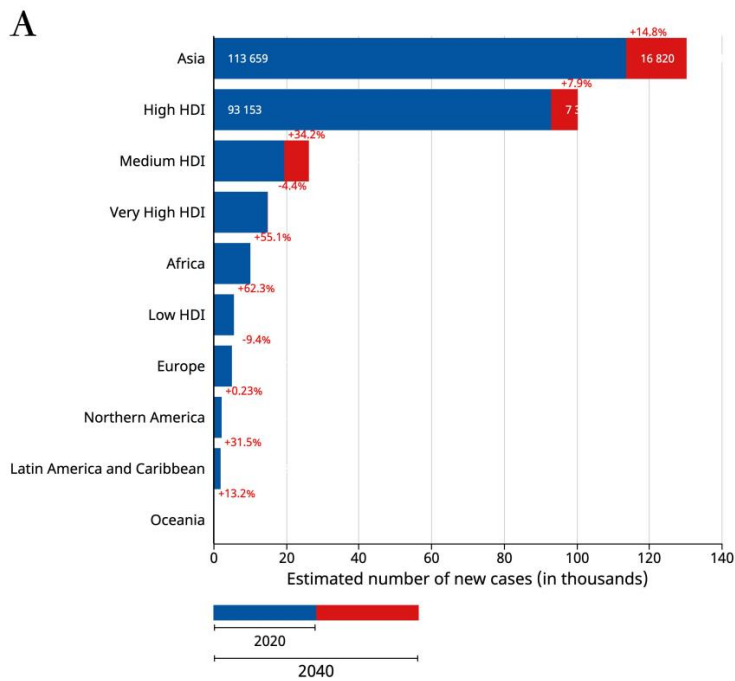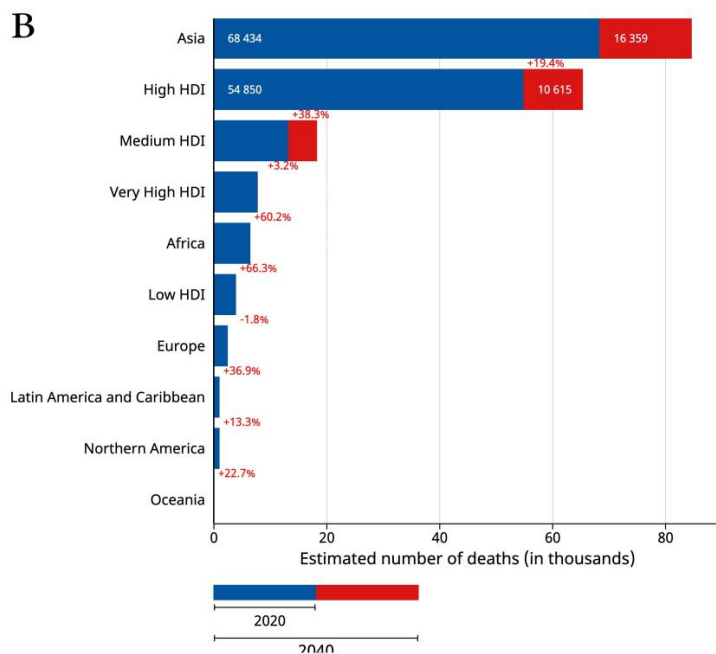

**Figure S4. Projected global trends in the burden of disease for ASIR and ASDR in NPC by region from 2020 to 2040, by sex.** (A) ASIR (B) ASDR ASIR = age standardized incidence rate. ASDR = age standardized death rate.

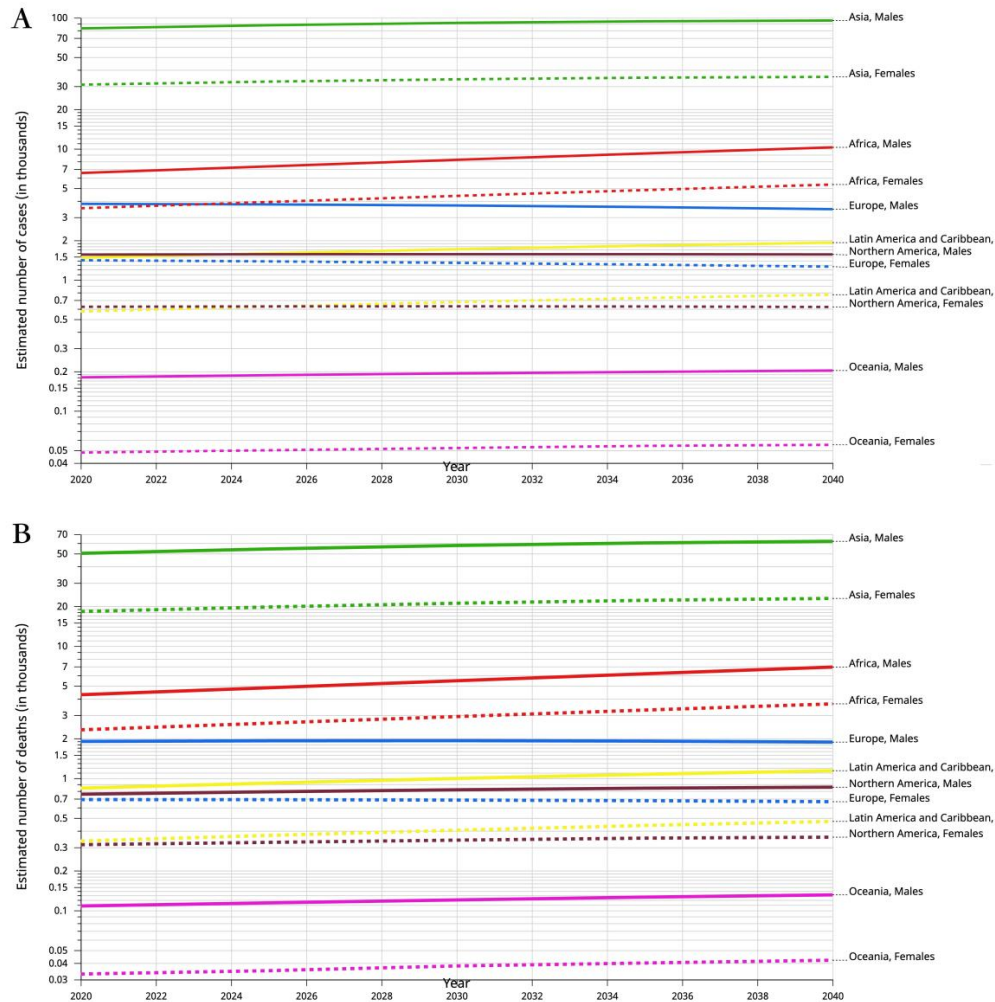

Supplement: bmjopen-2024-091087supp002_data_supplement.pdf [file bmjopen-2024-091087supp002_data_supplement.pdf]
